# Supplementary material for: Antioxidant Capacity, Nitrite and Nitrate Content in Beetroot-Based Dietary Supplements
Source: MDPI journal article supplement (doi:10.3390/foods12051017), 2023-02-27
Supplement: s1 [file s1]

Table S1. Collected information about the analysed beetroot samples.

1

| Form                      | Code | Water content (%) | Date of purchase | Certificate of organic cultivation | Place of purchase                   | Origin country |
|---------------------------|------|-------------------|------------------|------------------------------------|-------------------------------------|----------------|
| Conventionally cultivated | 1Bp  | 85.9              |                  |                                    |                                     |                |
|                           | 1Bs  | 83.2              | 11/05/2019       | no data                            | large-retail store, Gdańsk (PL)     | Poland (PL)    |
|                           | 1Bu  | 85.1              |                  |                                    |                                     |                |
|                           | 3Bp  | 85.2              |                  |                                    |                                     |                |
|                           | 3Bs  | 84.2              | 11/14/2019       | no data                            | small-retail store, Kolbudy (PL)    | PL             |
|                           | 3Bu  | 84.2              |                  |                                    |                                     |                |
|                           | 4Bp  | 81.8              |                  |                                    |                                     |                |
|                           | 4Bs  | 78.4              | 11/14/2019       | no data                            | large-retail store, Gdańsk (PL)     | PL             |
|                           | 4Bu  | 80.5              |                  |                                    |                                     |                |
|                           | 5Bp  | 88.1              |                  |                                    |                                     |                |
|                           | 5Bs  | 86.8              | 11/28/2019       | no data                            | large-retail store, Gdańsk (PL)     | PL             |
|                           | 5Bu  | 87.8              |                  |                                    |                                     |                |
| Organically cultivated    | 2Bp  | 83.2              | 11/05/2019       | P 095 18; Greater Poland (PL)      | large-retail store, Gdańsk (PL)     | PL             |
|                           | 2Bu  | 81.2              |                  |                                    |                                     |                |
|                           | 6Bp  | 85.2              |                  |                                    |                                     |                |
|                           | 6Bs  | 80.9              | 12/02/2019       | PL-EKO-07-07904 Wilkowa Wieś (PL)  | greengrocer's (online), Gdańsk (PL) | PL             |
|                           | 6Bu  | 83.1              |                  |                                    |                                     |                |
|                           | 7Bp  | 83.4              |                  |                                    |                                     |                |
|                           | 7Bs  | 80.0              | 12/02/2019       | PL-EKO-07-07904 Wilkowa Wieś (PL)  | greengrocer's (online), Gdańsk (PL) | PL             |
|                           | 7Bu  | 82.9              |                  |                                    |                                     |                |

Bp – peeled beetroot; Bs – beetroot skins, Bu – unpeeled beetroot

2

3

Table S2. Collected information about the analysed beetroot-based DSs.

4

| Code | The content of beetroot extract or preserves/dosage unit                                                                                                                                                                                                                                                                                | Declared weight of the dosage unit (g) <sup>1</sup> | Recommended daily dose    | Origin country                 |
|------|-----------------------------------------------------------------------------------------------------------------------------------------------------------------------------------------------------------------------------------------------------------------------------------------------------------------------------------------|-----------------------------------------------------|---------------------------|--------------------------------|
| C1   | beetroot extract (400 mg) containing 40 mg of nitrates; E464; inulin (70 mg)                                                                                                                                                                                                                                                            | NI / 0.3931                                         | 1x1 capsule               | Poland (PL)                    |
| C2   | red beetroot extract (200 mg); young barley extract (200 mg); capsule (glazing agent: E464); vitamin B <sub>3</sub> (60 mg); vitamin B <sub>5</sub> (18 mg); E460; vitamin B <sub>2</sub> (4.2 mg); vitamin B <sub>6</sub> (4.2 mg); vitamin B <sub>1</sub> (3.3 mg); vitamin B <sub>9</sub> (600 µg); vitamin B <sub>12</sub> (7.5 µg) | NI / 0.5151                                         | 1x1 capsule               | PL                             |
| C3   | beetroot extract (550 mg); E1204                                                                                                                                                                                                                                                                                                        | NI / 0.5781                                         | 2x1 capsule               | PL                             |
| C4   | extract of beetroot 10:1 (300 mg); capsule of vegetable cellulose                                                                                                                                                                                                                                                                       | 0.39 / 0.4011                                       | 2x1 capsule               | PL                             |
| C5A  | beetroot concentrate (268 mg); ascorbic acid (20 mg); iron gluconate (12 mg); E1400; E470b; E551                                                                                                                                                                                                                                        | 0.376 / 0.3121                                      | 1x3 capsule               | PL                             |
| C5B  |                                                                                                                                                                                                                                                                                                                                         | 0.376 / 0.3031                                      |                           |                                |
| C5C  |                                                                                                                                                                                                                                                                                                                                         | 0.376 / 0.301                                       |                           |                                |
| C6   | powdered red beetroot (400 mg); ascorbic acid (40 mg); iron (10 mg)                                                                                                                                                                                                                                                                     | NI / 0.9961                                         | 1x2 capsule               | PL                             |
| C7A  | Beta vulgaris extract 4:1 (550 mg); pullulan capsule                                                                                                                                                                                                                                                                                    | 0.69 / 0.601                                        | 1x2 capsule               | PL                             |
| C7B  |                                                                                                                                                                                                                                                                                                                                         | 0.69 / 0.6141                                       |                           |                                |
| C8A  | dried juice concentrate (438.5 mg); ascorbic acid (38 mg); iron (2.8 mg); gelatine capsule                                                                                                                                                                                                                                              | 0.596 / 0.5131                                      | 2x1 capsule with a meal   | PL                             |
| C8B  |                                                                                                                                                                                                                                                                                                                                         |                                                     |                           |                                |
| C9   | freeze-dried juice from organic pickled beetroot (300 mg); micronized apple fibre; cellulose capsule                                                                                                                                                                                                                                    | 0.3 / 0.2861                                        | 2x1 capsule before a meal | PL                             |
| C10  | 400 mg of root extract; 40 mg of nitrates                                                                                                                                                                                                                                                                                               | 0.5 / 0.3971                                        | 1x1 capsule               | PL                             |
| C11  | 400 mg of root extract; 40 mg of nitrates                                                                                                                                                                                                                                                                                               | 0.5/ 0.4031                                         | 1x1 capsule               | PL                             |
| C12  | beetroot (500 mg); E572; gelatine capsule                                                                                                                                                                                                                                                                                               | NI / 1.0141                                         | 3x2 caps                  | United States of America (USA) |
| C13  | organic beetroot extract with E1400 (700 mg) corresponding to 4620 mg of dried beetroot; HPMC capsule                                                                                                                                                                                                                                   | NI / 1.4281                                         | 1x2 capsule with a meal   | United Kingdom (UK)            |
| C14  | beetroot (500 mg); E460; E551; E572; HPMC capsule                                                                                                                                                                                                                                                                                       | NI / 1.0781                                         | 3x2 capsule with a meal   | USA                            |
| C15  | beetroot extract (500 mg); E460; E551; vegetable fatty; vegetable mineral salts                                                                                                                                                                                                                                                         | NI / 1.6251                                         | 3x1 capsule with a meal   | USA                            |

| Code | The content of beetroot extract or preserves/dosage unit                                                                                                                                                                         | Declared weight of the dosage unit (g) <sup>1</sup> | Recommended daily dose                     | Origin country      |
|------|----------------------------------------------------------------------------------------------------------------------------------------------------------------------------------------------------------------------------------|-----------------------------------------------------|--------------------------------------------|---------------------|
| C16  | beetroot extract (450 mg); E460; E464 capsule                                                                                                                                                                                    | NI / 1.1681                                         | 2x1 capsule                                | USA                 |
| C17  | beetroot extract 5:1 (500 mg) (5:1); E1400, E460; vegetable capsule shell: E464; anti-caking agents: E551, vegetable E572                                                                                                        | NI / 0.6281                                         | 1x1 capsule                                | USA                 |
| T1A  | beetroot extract 20:1 (350 mg); E341; E470b                                                                                                                                                                                      | 0.35                                                | 1x2 tablet witch a meal                    | UK                  |
| T1B  |                                                                                                                                                                                                                                  |                                                     |                                            |                     |
| T2A  | beetroot concentrate (488 mg); ascorbic acid (20 mg); iron gluconate (12 mg); E1400; E470b; E551                                                                                                                                 | 0.65                                                | 1x3 tablet                                 | PL                  |
| T2B  |                                                                                                                                                                                                                                  |                                                     |                                            |                     |
| T2C  |                                                                                                                                                                                                                                  |                                                     |                                            |                     |
| T3A  | dried juice (500 mg) equals 3.5 g of raw vegetable; E470b; E551                                                                                                                                                                  | 0.925                                               | 1-2x3 tablet witch a meal                  | PL                  |
| T3B  |                                                                                                                                                                                                                                  |                                                     |                                            |                     |
| T4   | dried juice concentrate (500 mg) equals 2.75 g of raw vegetable; B <sub>6</sub> (1 mg); B <sub>12</sub> (1.25 µg); E460; E470b, E551                                                                                             | 0.55                                                | 1-2x3 tablet                               | PL                  |
| T5   | beetroot root powder (100 mg); L-arginine alpha-ketoglutarate (125 mg); L-citrulline (125 mg); Beta-alanine (100 mg); E421; E967; E960; E460; E466; HPMC capsule; E330; natural flavours (cherry and vanilla); E464; E470a; E551 | 1.42                                                | 1x1-2 tablet<br>20-30 min before a workout | USA                 |
| T6   | beetroot extract (80 mg); E341; E460; vegetable E572 (2.25 mg)                                                                                                                                                                   | 0.35                                                | 2 tablet                                   | UK                  |
| T7   | fresh beetroot 7:1 (500 mg); E1400; L-ascorbic acid (40 mg); 7 mg iron (II) fumarate (7 mg); E420; E470b; E551                                                                                                                   | 0.63                                                | 1-2x1 tablet                               | PL                  |
| T8   | beetroot concentrate (500 mg); ascorbic acid (20 mg); iron (II) gluconate (12 mg); E1400; E470b; E551                                                                                                                            | 0.65                                                | 3x1 tablet                                 | PL                  |
| T9   | dried red beetroot concentrate (500 mg); vitamin B <sub>6</sub> (1 mg); vitamin B <sub>12</sub> (1.25 mg); E470b; E551                                                                                                           | 0.5                                                 | 3x1-2 tablet                               | PL                  |
| T10  | beetroot extract (1000 mg; trimethylglycine); E460, vegetable fatty acids, E466, E470b; E464; E460ii                                                                                                                             | 1.46                                                | 1-3x1 tablet                               | USA                 |
| T11  | of beetroot extract 10:1 (160 mg) including 1600 mg of nitrates; E341; E460; E470b                                                                                                                                               | 0.35                                                | 1x1-2 tablet with a meal                   | UK                  |
| T12  | beetroot extract 5:1 (315 mg); E341, E460; E570; E551; E572; E464; E422 ; E463                                                                                                                                                   | NI / 0.821                                          | 1 tablet                                   | UK                  |
| P1   | beetroot powder                                                                                                                                                                                                                  | 9.5                                                 | 1x1 spoon                                  | USA                 |
| P2   | 100% beetroot tuber extract                                                                                                                                                                                                      | 4.0                                                 | 3x1 teaspoon                               | Czech Republic (CZ) |
| P3   | powdered red beetroot                                                                                                                                                                                                            | 3.0                                                 | 1x1 teaspoon                               | Egypt (EG)          |

| Code | The content of beetroot extract or preserves/dosage unit                     | Declared weight of the dosage unit (g) <sup>1</sup> | Recommended daily dose                                                                              | Origin country |
|------|------------------------------------------------------------------------------|-----------------------------------------------------|-----------------------------------------------------------------------------------------------------|----------------|
| P4   | 100% powdered red beetroot                                                   | 15                                                  | 1 teaspoon                                                                                          | Croatia (HR)   |
| P5   | powdered BIO red beetroot                                                    | 15.0                                                | 1x3 teaspoons                                                                                       | Germany (DE)   |
| P6   | powdered beetroot 4:1 (Beta vulgaris extract)                                | 1.0                                                 | 1x half of a teaspoon                                                                               | PL             |
| P7   | powdered organic beetroot                                                    | 3.0                                                 | 2-3 flat teaspoons                                                                                  | China (CN)     |
| P8   | powdered red beetroot                                                        | 10                                                  | 1 spoon                                                                                             | USA            |
| P9   | beetroot crystals made of concentrated beetroot juice, 4 g/100 g of nitrates | 5.5                                                 | 2-3 teaspoons, 1-3 hours before a workout or just after a workout                                   | Ireland (IE)   |
| P10  | 100% powdered red beetroot, whole ground, not peeled                         | 15                                                  | Mix 1 tablespoon of the product with food                                                           | PL             |
| P11  | powdered beetroot 600 mg; L-ascorbic acid (80 mg); iron fumarate (42 mg)     | 0.72                                                | 1 measure (0.72 g)                                                                                  | NI             |
| P12  | 100% powdered BIO red beetroot                                               | 3.0                                                 | Mix 1 teaspoon (3 g) of the product with 200 ml of food. The suggested daily dose is 1-2 teaspoons. | Italy (IT)     |
| P13  | 100% powdered red beetroot                                                   | 10.0                                                | Add 1-2 teaspoons of beetroot powder (5-10 g) to food.                                              | PL             |

NI – lack of information; <sup>1</sup>for products where the manufacturer did not specify the weight of the unit and all products in capsules, it was determined empirically according to USP 43-NF 38 guidelines; <2091> chapter “Weight variation of dietary supplements”. This value was used for calculations. Products with a lack of “dietary supplement” marking on the package were marked in orange in the Table.

5  
6  
7  
8  
9  
10

Table S3. Optimisation of extraction of beetroot products on the example of a selected lyophilizate.

11

|         | Extraction technique | MAE                     |         | UAE 1<br>(20°C )        |         | UAE 2<br>(20°C)         |         |
|---------|----------------------|-------------------------|---------|-------------------------|---------|-------------------------|---------|
| Variant | Solvent<br>(v/v)     | $\bar{x}$<br>[mg GAE/g] | RSD [%] | $\bar{x}$<br>[mg GAE/g] | RSD [%] | $\bar{x}$<br>[mg GAE/g] | RSD [%] |
| A       | MiliQ+0.1%FA         | 6.51                    | 3.55    | 1.92                    | 4.43    | 6.00                    | 4.63    |
| B       | 25%MeOH+0.1%FA       | 7.23                    | 3.20    | 2.39                    | 6.75    | 7.15                    | 5.78    |
| C       | 50%MeOH+0.1%FA       | 7.05                    | 3.77    | 3.33                    | 14.05   | 7.26                    | 6.85    |
| D       | 75%MeOH+0.1%FA       | 5.75                    | 3.89    | 6.37                    | 5.00    | 5.82                    | 1.38    |
| E       | 25%EtOH+0.1%FA       | 6.96                    | 5.21    | 7.00                    | 5.06    | 6.72                    | 6.18    |
| F       | 50%EtOH+0.1%FA       | 6.65                    | 5.10    | 7.04                    | 7.06    | 6.95                    | 0.021   |
| G       | 75%EtOH+0.1%FA       | 5.69                    | 5.02    | 5.02                    | 5.03    | 5.99                    | 4.98    |

Table S4. Optimisation of the FC method because of model and incubation time.

14

| Model                    | 1                  |         | 2                  |         | 3                  |         | 4                  |         |
|--------------------------|--------------------|---------|--------------------|---------|--------------------|---------|--------------------|---------|
| Time of incubation [min] | $\bar{x}$<br>[Abs] | RSD [%] |
| 30                       | 0.071              | 0.001   | 0.065              | 0.297   | 0.060              | 0.001   | 0.053              | 0.44    |
| 60                       | 0.064              | 0.299   | 0.073              | 2.6     | 0.060              | 0.96    | 0.054              | 0.62    |
| 120                      | 0.088              | 7.6     | 0.14               | 13      | 0.064              | 0.001   | 0.053              | 0.36    |

Table S5. Optimisation of the FC method because of incubation time for lyophilizate and supplement in tablets according to method 1.

15

|              | Time of incubation [min] | $\bar{x}$<br>[Abs] | RSD [%] |
|--------------|--------------------------|--------------------|---------|
|              |                          |                    |         |
| lyophilizate | 30                       | 0.324              | 2.7     |
|              | 60                       | 0.315              | 5.1     |
|              | 120                      | 0.312              | 4.2     |
| supplement   | 30                       | 0.247              | 5.6     |
|              | 60                       | 0.258              | 2.1     |
|              | 120                      | 0.262              | 13.6    |

Table S6. Full characteristics of the analysed beetroot-based dietary supplements because of TAC, nitrate, and nitrite content.

18

| Product | Daily dose [g] | FC       |       | CUPRAC    |      | DPPH     |       | Nitrites |         |                  | Nitrates |     |                  |
|---------|----------------|----------|-------|-----------|------|----------|-------|----------|---------|------------------|----------|-----|------------------|
|         |                | mg GAE/g | SD    | µmol TE/g | SD   | Activity | SD    | µg/g     | SD      | ADI <sup>1</sup> | mg/kg    | SD  | ADI <sup>2</sup> |
| T1A     | 0.7            | 2.27     | 0.12  | 34        | 2.8  | 14%      | 1.2   | 1.142    | 0.079   | 0.0057           | 3008     | 47  | 0.602            |
| T1B     | 0.7            | 2.31     | 0.14  | 21        | 1.8  | 9.6%     | 0.83  | 0.293    | 0.026   | 0.0015           | 3008     | 68  | 0.602            |
| T2A     | 2.0            | 19.2     | 2.7   | 170       | 3.5  | 80%      | 5.7   | 1.34     | 0.14    | 0.019            | 2569     | 65  | 1.4              |
| T2B     | 2.0            | 16.25    | 0.34  | 175       | 7.6  | 88%      | 1.5   | 2.00     | 0.29    | 0.028            | 1933     | 158 | 1.1              |
| T2C     | 2.0            | 14.65    | 0.48  | 134       | 10   | 81%      | 4.9   | 1.40     | 0.12    | 0.0195           | 2483     | 126 | 1.4              |
| T3A     | 5.6            | 4.29     | 0.18  | 49        | 3.0  | 18%      | 0.79  | 2.484    | 0.082   | 0.098            | 1624     | 117 | 2.6              |
| T3B     | 5.6            | 4.10     | 0.46  | 49        | 1.2  | 16%      | 1.0   | 2.24     | 0.26    | 0.089            | 1702     | 55  | 2.7              |
| T4      | 3.3            | 4.22     | 0.14  | 47        | 1.9  | 18%      | 0.19  | 2.251    | 0.073   | 0.053            | 1979     | 159 | 1.9              |
| T5      | 2.8            | 1.30     | 0.15  | 38        | 5.5  | 8.9%     | 0.98  | 0.877    | 0.079   | 0.018            | 504      | 60  | 0.41             |
| T6      | 0.7            | 2.11     | 0.64  | 21        | 0.15 | 18%      | 0.34  | <LOQ     | -       | -                | 3112     | 134 | 0.62             |
| T7      | 1.3            | 32.5     | 1.8   | 278       | 0.41 | 90%      | 1.4   | 1.11     | 0.14    | 0.010            | 1050     | 75  | 0.38             |
| T8      | 2.0            | 13.0     | 1.5   | 134       | 12   | 81%      | 8.8   | <LOQ     | -       | -                | 2481     | 316 | 1.4              |
| T9      | 9.8            | 2.72     | 0.13  | 20        | 2.2  | 8.9%     | 0.61  | 0.549    | 0.060   | 0.039            | 1142     | 140 | 3.2              |
| T10     | 4.4            | 0.681    | 0.085 | 1         | 0.52 | 4.9%     | 0.57  | 0.537    | 0.082   | 0.017            | <LOQ     | -   | -                |
| T11     | 0.7            | 2.415    | 0.056 | 34        | 4.1  | 11%      | 0.89  | 1.20     | 0.16    | 0.0060           | 3746     | 91  | 0.75             |
| T12     | 2.5            | 2.40     | 0.20  | 18        | 2.4  | 13%      | 1.1   | 0.721    | 0.023   | 0.013            | 1142     | 113 | 0.80             |
| C1      | 0.39           | 6.2      | 0.71  | 62        | 5.2  | 22%      | 1.4   | 1.9      | 0.18    | 0.0053           | 4305     | 49  | 0.48             |
| C2      | 0.52           | 2.7      | 0.064 | 19        | 6.2  | 7.2%     | 0.896 | 0.95     | 0.095   | 0.0035           | 383      | 13  | 0.056            |
| C3      | 1.2            | 3.7      | 0.22  | 46        | 3.9  | 15%      | 0.52  | 3.2      | 0.25    | 0.026            | 1037.0   | 9.8 | 0.34             |
| C4      | 0.80           | 12       | 1.5   | 142       | 3.6  | 46%      | 1.2   | 8.9      | 0.54    | 0.051            | <LOQ     | -   | -                |
| C5A     | 0.94           | 34       | 0.99  | 274       | 37   | 71%      | 2.5   | 2.0      | 0.27    | 0.043            | 1959     | 49  | 3.5              |
| C5B     | 0.91           | 35       | 2.0   | 254       | 4.8  | 90%      | 0.97  | 0.88     | 0.084   | 0.0057           | 1926     | 36  | 0.50             |
| C5C     | 0.90           | 31       | 2.8   | 278       | 13   | 90%      | 1.6   | 1.2      | 0.13    | 0.0076           | 1907     | 128 | 0.49             |
| C6      | 1.0            | 37       | 3.4   | 285       | 27   | 82%      | 7.2   | 2.8      | 0.26    | 0.020            | <LOQ     | -   | -                |
| C7A     | 1.2            | 3.6      | 0.25  | 44        | 1.1  | 14%      | 0.38  | <LOQ     | -       | -                | 5205     | 183 | 1.8              |
| C7B     | 1.2            | 3.4      | 0.42  | 31        | 4.2  | 14%      | 0.91  | 2.0      | 0.094   | 0.018            | 11924    | 576 | 4.2              |
| C8A     | 1.0            | 41       | 3.2   | 268       | 26   | 74%      | 1.5   | 1.8      | 0.078   | 0.013            | 3814     | 203 | 1.1              |
| C8B     | 1.0            | 40       | 3.3   | 312       | 28   | 90%      | 0.087 | 1.0      | 0.00302 | 0.0076           | 784      | 112 | 0.23             |
| C9      | 0.57           | 14       | 0.42  | 210       | 7.3  | 43%      | 5.1   | 3.8      | 0.55    | 0.015            | 4739     | 125 | 0.77             |
| C10     | 0.40           | 1.96     | 0.10  | 13        | 1.8  | 11%      | 1.5   | 0.93     | 0.0053  | 0.0026           | <LOQ     | -   | -                |

| Product |  | Daily dose [g] | mg GAE/g | SD      | μmol TE/g | SD   | Activity | SD   | μg/g | SD     | ADI <sup>1</sup> | mg/kg | SD  | ADI <sup>2</sup> |
|---------|--|----------------|----------|---------|-----------|------|----------|------|------|--------|------------------|-------|-----|------------------|
| C11     |  | 0.40           | 1.8      | 0.039   | 16        | 1.1  | 10%      | 0.49 | 0.81 | 0.1002 | 0.0023           | <LOQ  | -   | -                |
| C12     |  | 3.0            | 3.2      | 0.16    | 33        | 3.0  | 12%      | 1.0  | 0.99 | 0.082  | 0.022            | 1284  | 132 | 1.1              |
| C13     |  | 1.4            | 5.1      | 0.21    | 49        | 2.4  | 18%      | 1.2  | 1.1  | 0.15   | 0.012            | 8461  | 256 | 3.5              |
| C14     |  | 3.2            | 8.7      | 1.02    | 112       | 1.9  | 33%      | 0.82 | 7.4  | 0.81   | 0.170            | 4460  | 256 | 4.1              |
| C15     |  | 1.9            | 4.5      | 0.28    | 55        | 4.8  | 17%      | 0.52 | 1.1  | 0.079  | 0.015            | 2373  | 218 | 1.3              |
| C16     |  | 1.2            | 8.9      | 0.11    | 100       | 6.4  | 41%      | 0.50 | 1.2  | 0.081  | 0.010            | 15186 | 454 | 5.1              |
| C17     |  | 1.9            | 4.3      | 0.11    | 52        | 2.2  | 17%      | 0.59 | <LOQ | -      | -                | 2170  | 50  | 1.2              |
| P1      |  | 9.5            | 9.9      | 0.21    | 127       | 9.8  | 37%      | 1.5  | 2.2  | 0.18   | 0.15             | 1590  | 125 | 4.3              |
| P2      |  | 12             | 4.99     | 0.089   | 76        | 4.02 | 22%      | 1.4  | 3.3  | 0.14   | 0.28             | 1774  | 1.2 | 6.1              |
| P3      |  | 3              | 10       | 0.19    | 105       | 12   | 40%      | 1.6  | 2.5  | 0.37   | 0.053            | 299   | 41  | 0.26             |
| P4      |  | 15             | 11       | 0.55    | 119       | 2.5  | 34%      | 2.2  | 0.95 | 0.078  | 0.10             | 1603  | 170 | 6.9              |
| P5      |  | 15             | 13       | 1.03    | 163       | 17   | 44%      | 3.5  | 3.9  | 0.0088 | 0.42             | 1457  | 125 | 6.2              |
| P6      |  | 1              | 4.1      | 0.204   | 48        | 3.8  | 16%      | 0.91 | 1.7  | 0.25   | 0.012            | 2757  | 316 | 0.79             |
| P7      |  | 9              | 6.8      | 0.66    | 80        | 1.6  | 24%      | 1.2  | <LOQ | -      | -                | <LOQ  | -   | -                |
| P8      |  | 10             | 9.2      | 0.48    | 106       | 4.99 | 31%      | 0.22 | 1.2  | 0.17   | 0.089            | 91.4  | 1.6 | 0.26             |
| P9      |  | 17             | 15       | 2.1     | 213       | 15   | 48%      | 1.6  | 1.7  | 0.12   | 0.21             | 10224 | 200 | 48               |
| P10     |  | 15             | 11       | 0.89    | 145       | 16   | 40%      | 3.3  | 5.2  | 0.78   | 0.55             | 6597  | 495 | 28               |
| P11     |  | 0.72           | 61       | 2.0     | 467       | 12   | 90%      | 1.1  | 2.8  | 0.034  | 0.014            | 5127  | 505 | 1.1              |
| P12     |  | 6              | 2.5      | 0.07995 | 27        | 1.2  | 12%      | 0.29 | 2.3  | 0.29   | 0.099            | 5300  | 478 | 9.1              |
| P13     |  | 10             | 11       | 1.3     | 127       | 14   | 42%      | 4.6  | 6.4  | 0.71   | 0.45             | 13110 | 755 | 37               |

<sup>1</sup> ADI calculated for 70 kg person (14 mg of nitrite ions/70 kg/day); <sup>2</sup>ADI calculated for 70 kg person (350 mg of nitrate ions/70 kg/day) SD—standard 19



Table S7. Full characteristics of the analysed beetroots samples because of TAC, nitrate, and nitrite content.

|              | Prod-<br>uct | Daily<br>dose<br>[g<br>f.w.] | FC                      |      |                    |     | CUPRAC               |     |                     |     | DPPH          |      | Nitrites     |        |             |       |                  | Nitrates          |     |             |      |                  |
|--------------|--------------|------------------------------|-------------------------|------|--------------------|-----|----------------------|-----|---------------------|-----|---------------|------|--------------|--------|-------------|-------|------------------|-------------------|-----|-------------|------|------------------|
|              |              |                              | mg<br>GAE/<br>g<br>d.w. | SD   | mg<br>GAE/<br>dose | SD  | μmol<br>TE/g<br>d.w. | SD  | μmol<br>TE/do<br>se | SD  | Ac-<br>tivity | SD   | μg/g<br>d.w. | SD     | μg/do<br>se | SD    | ADI <sup>1</sup> | mg/k<br>g<br>d.w. | SD  | mg/d<br>ose | SD   | ADI <sup>2</sup> |
| Conventional | 1C           | 100                          | 11                      | 0.95 | 187                | 17  | 146                  | 3.9 | 2561                | 68  | 39%           | 3.5  | 2.0          | 0.011  | 34          | 0.19  | 0.25             | 5645              | 388 | 99          | 6.8  | 28               |
|              | 1Sk          | 100                          | 22                      | 2.4  | 450                | 49  | 199                  | 6.0 | 4012                | 122 | 63%           | 6.2  | 3.2          | 0.26   | 66          | 5.3   | 0.47             | 7562              | 319 | 153         | 6.4  | 44               |
|              | 1O           | 100                          | 7.2                     | 0.15 | 117                | 2.5 | 93                   | 2.7 | 1522                | 44  | 30%           | 2.9  | 1.6          | 0.19   | 26          | 3.1   | 0.19             | 7307              | 129 | 120         | 2.1  | 34               |
|              | 3C           | 100                          | 14                      | 0.27 | 259                | 5.0 | 168                  | 14  | 3144                | 256 | 41%           | 0.27 | 1.4          | 0.0017 | 26          | 0.032 | 0.19             | 2908              | 230 | 55          | 4.3  | 16               |
|              | 3Sk          | 100                          | 26                      | 1.7  | 482                | 33  | 365                  | 43  | 6876                | 815 | 60%           | 1.3  | 2.5          | 0.0026 | 47          | 0.049 | 0.33             | 2535              | 115 | 48          | 2.2  | 14               |
|              | 3O           | 100                          | 12                      | 0.46 | 202                | 8.1 | 151                  | 9.1 | 2624                | 159 | 42%           | 0.27 | 0.702        | 0.055  | 12          | 0.96  | 0.087            | 2570              | 142 | 45          | 2.5  | 13               |
|              | 4C           | 100                          | 12                      | 0.23 | 291                | 5.5 | 150                  | 3.7 | 3623                | 89  | 40%           | 2.1  | 1.7          | 0.14   | 42          | 3.4   | 0.30             | 4178              | 243 | 101         | 5.9  | 29               |
|              | 4Sk          | 100                          | 22                      | 1.8  | 595                | 51  | 289                  | 25  | 7988                | 684 | 56%           | 2.7  | 7.1          | 0.91   | 196         | 25    | 1.4              | 2101              | 166 | 58          | 4.6  | 17               |
|              | 4O           | 100                          | 8.0                     | 1.3  | 179                | 28  | 110                  | 11  | 2445                | 241 | 32%           | 3.1  | 2.0          | 0.12   | 45          | 2.7   | 0.32             | 6692              | 141 | 149         | 3.1  | 43               |
|              | 5C           | 100                          | 11                      | 1.3  | 147                | 17  | 145                  | 9.4 | 2008                | 131 | 37%           | 3.0  | 1.6          | 0.23   | 22          | 3.2   | 0.16             | 8801              | 287 | 122         | 4.0  | 35               |
| Organic      | 5Sk          | 100                          | 15                      | 0.94 | 235                | 14  | 260                  | 18  | 3945                | 274 | 52%           | 3.2  | 3.4          | 0.023  | 51          | 0.35  | 0.37             | 3456              | 13  | 52          | 0.19 | 15               |
|              | 5O           | 100                          | 6.8                     | 0.32 | 91                 | 4.3 | 98                   | 3.7 | 1320                | 50  | 28%           | 2.3  | 1.4          | 0.17   | 19          | 2.3   | 0.13             | 6003              | 352 | 82          | 5.9  | 23               |
|              | 2C           | 100                          | 12                      | 0.49 | 284                | 11  | 160                  | 5.4 | 3712                | 126 | 39%           | 1.1  | 3.8          | 0.55   | 89          | 13    | 0.64             | 3511              | 255 | 134         | 3.3  | 23               |
|              | 2O           | 100                          | 9.7                     | 0.64 | 196                | 13  | 123                  | 13  | 2490                | 265 | 36%           | 2.5  | 3.6          | 0.53   | 73          | 11    | 0.52             | 6606              | 162 | 57          | 0.38 | 38               |
|              | 6C           | 100                          | 13                      | 1.1  | 275                | 23  | 208                  | 11  | 4244                | 216 | 46%           | 0.57 | 2.0          | 0.14   | 41          | 2.9   | 0.30             | 2817              | 19  | 11          | 0.28 | 16               |
|              | 6Sk          | 100                          | 34                      | 0.91 | 794                | 22  | 413                  | 15  | 9779                | 366 | 63%           | 3.3  | 2.8          | 0.087  | 66          | 2.1   | 0.47             | 461               | 12  | 39          | 0.48 | 3.1              |
|              | 6O           | 100                          | 9.8                     | 0.68 | 170                | 12  | 151                  | 6.9 | 2613                | 121 | 37%           | 0.82 | 2.0          | 0.29   | 34          | 5.0   | 0.24             | 2235              | 28  | 58          | 2.4  | 11               |
|              | 7C           | 100                          | 15                      | 0.93 | 310                | 19  | 198                  | 4.3 | 4097                | 89  | 44%           | 1.3  | 4.8          | 0.44   | 100         | 9.1   | 0.72             | 2782              | 116 | 11          | 0.30 | 16               |
|              | 7Sk          | 100                          | 24                      | 1.8  | 600                | 45  | 358                  | 28  | 8933                | 698 | 64%           | 5.5  | 7.0          | 1.0    | 175         | 26    | 1.3              | 423               | 12  | 41          | 1.5  | 3.02             |
|              | 7O           | 100                          | 9.9                     | 0.72 | 198                | 14  | 124                  | 16  | 2464                | 309 | 31%           | 2.6  | 15           | 0.59   | 293         | 12    | 2.1              | 2065              | 75  | 82          | 5.9  | 12               |

<sup>1</sup> ADI calculated for 70 kg person (14 mg of nitrite ions/70 kg/day); <sup>2</sup> ADI calculated for 70 kg person (350 mg of nitrate ions/70 kg/day); d.w. – dry weight

Table S8. The results of the Mann-Whitney U test check the existence of differences between the individual groups of the analysed products (values  $p < 0.05$  are marked in red).

| F-C assay | Expressed as mg GAE/d.d. |              | Tablets               | Capsules             | Powders               | Lyophilizate           |
|-----------|--------------------------|--------------|-----------------------|----------------------|-----------------------|------------------------|
|           |                          | Tablets      | -                     | 0.987924             | $9.9 \times 10^{-5}$  | $3 \times 10^{-10}$    |
|           |                          | Capsules     | 0.987924              | -                    | $4.4 \times 10^{-5}$  | $5 \times 10^{-8}$     |
|           |                          | Powders      | $9.9 \times 10^{-5}$  | $4.4 \times 10^{-5}$ | -                     | $3.8 \times 10^{-5}$   |
|           |                          | Lyophilizate | $3 \times 10^{-10}$   | $5 \times 10^{-8}$   | $3.8 \times 10^{-5}$  | -                      |
|           | Expressed as mg GAE/g    | Tablets      | -                     | 0.072627             | 0.07546               | $4.866 \times 10^{-3}$ |
|           |                          | Capsules     | 0.072627              | -                    | 0.483821              | 0.146878               |
|           |                          | Powders      | 0.07546               | 0.483821             | -                     | 0.093978               |
|           |                          | Lyophilizate | <b>0.004866</b>       | 0.146878             | 0.093978              | -                      |
| CUPRAC    | Expressed as mg TE/d.d.  | Tablets      | -                     | 0.617087             | $1.59 \times 10^{-4}$ | $3 \times 10^{-10}$    |
|           |                          | Capsules     | 0.617087              | -                    | $2.3 \times 10^{-5}$  | $5 \times 10^{-8}$     |
|           |                          | Powders      | $1.59 \times 10^{-4}$ | $2.3 \times 10^{-5}$ | -                     | $7 \times 10^{-6}$     |
|           |                          | Lyophilizate | $3 \times 10^{-10}$   | $5 \times 10^{-8}$   | $7 \times 10^{-5}$    | -                      |
|           | Expressed as mg TE/g     | Tablets      | -                     | 0.138403             | 0.055535              | $2.53 \times 10^{-4}$  |
|           |                          | Capsules     | 0.138403              | -                    | 0.440962              | <b>0.034565</b>        |
|           |                          | Powders      | 0.055535              | 0.440962             | -                     | <b>0.024274</b>        |
|           |                          | Lyophilizate | $2.53 \times 10^{-3}$ | <b>0.034565</b>      | <b>0.024274</b>       | -                      |

d. d. – daily dose recommended by the manufacturer

Table S9. The results of the correlation between the TAC and TPC results obtained by different methods of beetroot and beetroot-based products (Spearman's rank correlation coefficient). Values which were statistically significant ( $p < 0.05$ ) are marked in red.

|          |                    | FC [mg GAE/g]         | CUPRAC<br>[μmol TE/g] | DPPH [%]              |
|----------|--------------------|-----------------------|-----------------------|-----------------------|
|          | FC [mg GAE/g]      | x                     | 0.960787 <sup>b</sup> | 0.957410 <sup>b</sup> |
| Beetroot | CUPRAC [μmol TE/g] | 0.960787 <sup>b</sup> | x                     | 0.940955 <sup>b</sup> |
|          | DPPH [%]           | 0.957410 <sup>b</sup> | 0.940955 <sup>b</sup> | x                     |
|          | FC [mg GAE/g]      | x                     | 0.971429 <sup>b</sup> | 0.968831 <sup>b</sup> |
| Capsules | CUPRAC [μmol TE/g] | 0.971429 <sup>b</sup> | x                     | 0.971429 <sup>b</sup> |
|          | DPPH [%]           | 0.968831 <sup>b</sup> | 0.971429 <sup>b</sup> | x                     |
|          | FC [mg GAE/g]      | x                     | 0.858824 <sup>b</sup> | 0.850000 <sup>b</sup> |
| Tablets  | CUPRAC [μmol TE/g] | 0.858824 <sup>b</sup> | x                     | 0.852941 <sup>b</sup> |
|          | DPPH [%]           | 0.850000 <sup>b</sup> | 0.852941 <sup>b</sup> | x                     |
|          | FC [mg GAE/g]      | x                     | 0.923077 <sup>b</sup> | 0.939560 <sup>b</sup> |
| Powders  | CUPRAC [μmol TE/g] | 0.923077 <sup>b</sup> | x                     | 0.917582 <sup>b</sup> |
|          | DPPH [%]           | 0.939560 <sup>b</sup> | 0.917582 <sup>b</sup> | x                     |

<sup>a</sup>  $p > 0.05$ ; <sup>b</sup>  $p < 0.05$ 

35

36

37

Table S10. Results of U Mann Whitney test for all analysed samples because of nitrites and nitrates content [mg/kg] (values p < 0.05 are marked in red).

|          |          | Beetroot              | Capsules | Tablets                | Powders                |
|----------|----------|-----------------------|----------|------------------------|------------------------|
| Nitrites | beetroot | x                     | 0.014038 | 2.95×10 <sup>-4</sup>  | 0.671316               |
|          | capsules | 0.014038              | x        | 0.262612               | 0.118561               |
|          | tablets  | 2.95×10 <sup>-4</sup> | 0.262612 | x                      | 7.429×10 <sup>-3</sup> |
|          | powders  | 0.671316              | 0.118561 | 7.429×10 <sup>-3</sup> | x                      |
| Nitrates | beetroot | x                     | 0.262612 | 0.262612               | 0.262612               |
|          | capsules | 0.262612              | x        | 0.724077               | 0.722644               |
|          | tablets  | 0.262612              | 0.724077 | x                      | 0.59859                |
|          | powders  | 0.262612              | 0.722644 | 0.59859                | x                      |

38  
39

Table S11. The results of the correlation between the antioxidant potential and the content of nitrites and nitrate in beetroot and beetroot-based products (Spearman's rank correlation coefficient). Values which were statistically significant ( $p < 0.05$ ) are marked in red.

|          |                                 | Nitrites [ $\mu\text{g/g}$ ] | Nitrates [ $\text{mg/kg}$ ]         |
|----------|---------------------------------|------------------------------|-------------------------------------|
| beetroot | FC [ $\text{mg GAE/g}$ ]        | 0.398041 <sup>a</sup>        | -0.536753 <sup>b</sup>              |
|          | CUPRAC [ $\mu\text{mol TE/g}$ ] | 0.409929 <sup>a</sup>        | -0.628808 <sup>b</sup>              |
| capsules | FC [ $\text{mg GAE/g}$ ]        | 0.423514 <sup>a</sup>        | 0.085994 <sup>a</sup>               |
|          | CUPRAC [ $\mu\text{mol TE/g}$ ] | 0.426762 <sup>a</sup>        | $8.469 \times 10^{-3}$ <sup>a</sup> |
| tablets  | FC [ $\text{mg GAE/g}$ ]        | 0.484180 <sup>a</sup>        | 0.038235 <sup>a</sup>               |
|          | CUPRAC [ $\mu\text{mol TE/g}$ ] | 0.482708 <sup>a</sup>        | 0.067647 <sup>a</sup>               |
| powders  | FC [ $\text{mg GAE/g}$ ]        | 0.202797 <sup>a</sup>        | 0.195804 <sup>a</sup>               |
|          | CUPRAC [ $\mu\text{mol TE/g}$ ] | 0.272727 <sup>a</sup>        | 0.209790 <sup>a</sup>               |

<sup>a</sup>  $p > 0.05$ ; <sup>b</sup>  $p < 0.05$
